# Supplementary material for: Fluent molecular mixing of Tau isoforms in Alzheimer’s disease neurofibrillary tangles
Source: PubMed Central journal article supplement (PMC9142584; doi:10.1038/s41467-022-30585-0), 2022-05-27
Supplement: 41467_2022_30585_MOESM1_ESM.pdf [file 41467_2022_30585_MOESM1_ESM.pdf]

# Supplementary Information

## Fluent Molecular Mixing of Tau Isoforms in Alzheimer's Disease Neurofibrillary Tangles

Aurelio J. Dregni<sup>1§</sup>, Pu Duan<sup>1§</sup>, Hong Xu<sup>2</sup>, Lakshmi Changolkar<sup>2</sup>, Nadia El Mammeri<sup>1</sup>, Virginia M.-Y. Lee<sup>2</sup>, and Mei Hong<sup>1\*</sup>

<sup>1</sup> Department of Chemistry, Massachusetts Institute of Technology, 170 Albany Street,  
Cambridge, MA 02139

<sup>2</sup> Department of Pathology and Laboratory Medicine, Institute On Aging and Center for  
Neurodegenerative Disease Research, University of Pennsylvania School of Medicine,  
Philadelphia, PA, 19104, USA

**This PDF file includes:**

Supplementary Tables 1 - 5

Supplementary Figures 1 to 7

**Supplementary Table 1.** Cases of Alzheimer's disease brains used in this solid-state NMR study.

| <b>Case no.</b> | <b>Disease Duration (yr)</b> | <b>Gender</b> | <b>Neuropathological diagnosis</b> |
|-----------------|------------------------------|---------------|------------------------------------|
| 1               | 11                           | F             | Alzheimer's disease                |
| 2               | 6                            | F             | Alzheimer's disease                |
| 3               | 7                            | M             | Alzheimer's disease                |
| 4               | 9                            | F             | Alzheimer's disease                |
| 5               | 11                           | F             | Alzheimer's disease                |
| 6               | 9                            | M             | Alzheimer's disease                |
| 7               | 8                            | M             | Alzheimer's disease                |
| 8               | 16                           | F             | Alzheimer's disease                |
| 9               | 3                            | M             | Alzheimer's disease                |
| 10              | 8                            | F             | Alzheimer's disease                |

**Supplementary Table 2.** Characterization of supernatant fraction from human brain extraction (“AD Seeds”).

|               | Conc. of Tau by ELISA | Total protein Conc. by BCA | Purity (tau / total protein) | Conc. of A $\beta$ <sub>42</sub> by ELISA | Conc. of A $\beta$ <sub>42</sub> by ELISA | Conc. of $\alpha$ -synuclein by ELISA |
|---------------|-----------------------|----------------------------|------------------------------|-------------------------------------------|-------------------------------------------|---------------------------------------|
| Pooled AD-tau | 0.55 $\mu$ g/ $\mu$ l | 5.28 $\mu$ g/ $\mu$ l      | 10%                          | 14.61 ng/ $\mu$ l                         | 59.16 ng/ $\mu$ l                         | 0.46 ng/ $\mu$ l                      |

**Supplementary Table 3.** Morphologies of AD-seeded tau and heparin-fibrilized tau. At least 5 different particles from two or more different TEM images were sampled using ImageJ, and a total of at least 10 readings were averaged to give each of the statistics below.

| Samples                             | Twisted fibrils                        |               |               | Straight fibrils |
|-------------------------------------|----------------------------------------|---------------|---------------|------------------|
|                                     | Crossover length                       | Narrow width  | Wide width    | Width            |
| [AD]4R <sup>N</sup> 3R <sup>C</sup> | 86.9 ± 10.6 nm                         | 9.9 ± 1.6 nm  | 25.1 ± 1.8 nm | 15.2 ± 0.9 nm    |
| [AD]4R <sup>NC</sup>                | 99.3 ± 9.4 nm                          | 10.7 ± 1.6 nm | 24.3 ± 1.7 nm | 15.9 ± 1.3 nm    |
| [AD]3R <sup>NC</sup>                | 100.7 ± 16.5 nm                        | 10.6 ± 1.0 nm | 24.7 ± 2.7 nm | 16.3 ± 1.0 nm    |
| [AD]3R <sup>N</sup> 4R <sup>C</sup> | 93.8 ± 18.0 nm                         | 10.0 ± 1.1 nm | 25.5 ± 1.9 nm | 16.0 ± 1.0 nm    |
| Heparin-0N4R                        | 16.1 ± 1.6 nm, long straight filaments |               |               |                  |
| Heparin-0N3R                        | 22.9 ± 0.6 nm, straight ribbons        |               |               |                  |
| Hep-0N3R/0N4R mix                   | 13.8 ± 1.3 nm, long straight filaments |               |               |                  |

**Supplementary Table 4.** Concentrations of tau added to fibril growth mixtures and validation by the 1D NMR spectral quantification.

| Samples                             | Tau monomers for fibrillization                                                         | Composition of AD seeded samples from 1D NMR spectral quantification |
|-------------------------------------|-----------------------------------------------------------------------------------------|----------------------------------------------------------------------|
| [AD]4R <sup>N</sup> 3R <sup>C</sup> | 18 μM <sup>2</sup> H, <sup>13</sup> C-0N3R + 18 μM <sup>2</sup> H, <sup>15</sup> N-0N4R | #1: 40.0% 3R, 60.0 ± 3.0% 4R,<br>#2: 37.4% 3R, 62.6 ± 3.0% 4R        |
| [AD]4R <sup>NC</sup>                | 36 μM <sup>2</sup> H, <sup>13</sup> C, <sup>15</sup> N-0N4R                             | 100% 4R                                                              |
| [AD]3R <sup>NC</sup>                | 36 μM <sup>2</sup> H, <sup>13</sup> C, <sup>15</sup> N-0N3R                             | 100% 3R                                                              |
| [AD]3R <sup>N</sup> 4R <sup>C</sup> | 18 μM <sup>2</sup> H, <sup>13</sup> C-0N4R + 18 μM <sup>2</sup> H, <sup>15</sup> N-0N3R | #1: 39.2 ± 3.0% 3R, 60.8% 4R<br>#2: 37.9 ± 3.0% 3R, 62.1% 4R         |
| 100:0 4R                            | 10 μM <sup>2</sup> H, <sup>13</sup> C-0N4R + 0 μM <sup>2</sup> H, <sup>15</sup> N-0N4R  |                                                                      |
| 70:30 4R                            | 7 μM <sup>2</sup> H, <sup>13</sup> C-0N4R + 3 μM <sup>2</sup> H, <sup>15</sup> N-0N4R   |                                                                      |
| 60:40 4R                            | 6 μM <sup>2</sup> H, <sup>13</sup> C-0N4R + 4 μM <sup>2</sup> H, <sup>15</sup> N-0N4R   |                                                                      |
| 50:50 4R                            | 5 μM <sup>2</sup> H, <sup>13</sup> C-0N4R + 5 μM <sup>2</sup> H, <sup>15</sup> N-0N4R   |                                                                      |
| 40:60 4R                            | 4 μM <sup>2</sup> H, <sup>13</sup> C-0N4R + 6 μM <sup>2</sup> H, <sup>15</sup> N-0N4R   |                                                                      |
| 30:70 4R                            | 3 μM <sup>2</sup> H, <sup>13</sup> C-0N4R + 7 μM <sup>2</sup> H, <sup>15</sup> N-0N4R   |                                                                      |

**Supplementary Table 5.** NMR experimental parameters in this study. All experiments were conducted using a Bruker 1.3 mm HCN probe on a Bruker Avance III HD 600 MHz spectrometer or Avance II 800 MHz spectrometer. The rf field strength for  $^1\text{H}$ ,  $^{13}\text{C}$  and  $^{15}\text{N}$  channel pulses are 83.3 kHz, 62.5 kHz and 50 kHz, respectively.

| Experiment                                                     | NMR Parameters                                                                                                                                                                                                                                                                                                                                                                                                                                                                                                                                                                                                                                                                           | Experimental Time per sample |
|----------------------------------------------------------------|------------------------------------------------------------------------------------------------------------------------------------------------------------------------------------------------------------------------------------------------------------------------------------------------------------------------------------------------------------------------------------------------------------------------------------------------------------------------------------------------------------------------------------------------------------------------------------------------------------------------------------------------------------------------------------------|------------------------------|
| 1D $^{13}\text{C}$ DP                                          | $B_0 = 14.1$ T, ns = 2048 or 6144, $\tau_{\text{rd}} = 5$ s, $\tau_{\text{dw}} = 10$ $\mu\text{s}$ , $\tau_{\text{acq}} = 30.7$ ms, $\nu_{\text{H,DEC}} = 130$ kHz, $\nu_{\text{MAS}} = 20$ kHz, $T_{\text{bearing}} = 278$ K, $\delta_{\text{H}_2\text{O}} = 4.89$ ppm, $d_1 = 5$ s                                                                                                                                                                                                                                                                                                                                                                                                     | 3 hr or 9 hr                 |
| 1D J-hnH                                                       | $B_0 = 14.1$ T, ns = 256 or 512, $\tau_{\text{rd}} = 1.5$ s, $\tau_{\text{dw}} = 15$ $\mu\text{s}$ , $\tau_{\text{acq}} = 92.2$ ms, $\tau_{\text{INEPT}} = 10$ ms, $\tau_{\text{MISSISSIPPI}} = 0.3$ s, $\nu_{\text{H,DEC}} = 130$ kHz, $\nu_{\text{C,DEC}} = 3.6$ kHz, $\nu_{\text{N,DEC}} = 3.6$ kHz, $\nu_{\text{MAS}} = 20$ kHz, $T_{\text{bearing}} = 293$ K, $\delta_{\text{H}_2\text{O}} = 4.77$ ppm.                                                                                                                                                                                                                                                                             | 10 min or 20 min             |
| 1D dipolar hnH                                                 | $B_0 = 14.1$ T, ns = 256 or 512, $\tau_{\text{rd}} = 1.5$ s, $\tau_{\text{dw}} = 15$ $\mu\text{s}$ , $\tau_{\text{acq}} = 23.0$ ms, $\tau_{\text{HN}} = 1250$ $\mu\text{s}$ , $\tau_{\text{NH}} = 400$ $\mu\text{s}$ , $\tau_{\text{MISSISSIPPI}} = 0.3$ s, $\nu_{\text{C,DEC}} = 3.6$ kHz, $\nu_{\text{N,DEC}} = 3.6$ kHz, $\nu_{\text{MAS}} = 20$ kHz, $T_{\text{bearing}} = 278$ K, $\delta_{\text{H}_2\text{O}} = 4.89$ ppm.                                                                                                                                                                                                                                                         | 10 min or 20 min             |
| $^1\text{H}$ -detected $^{15}\text{N}$ - $^{13}\text{C}$ REDOR | $B_0 = 14.1$ T, ns = 256*6*2 to 256*8*2 for each REDOR time, $\tau_{\text{rd}} = 1.5$ s, $\tau_{\text{dw}} = 15$ $\mu\text{s}$ , $\tau_{\text{acq}} = 23.0$ ms, $\tau_{\text{HN}} = 1250$ $\mu\text{s}$ , $\tau_{\text{NH}} = 400$ $\mu\text{s}$ , $\tau_{\text{MISSISSIPPI}} = 0.3$ s, $\tau_{\text{REDOR}} = 0.1$ ms to 25 ms (28 REDOR time in total), $\nu_{\text{H,DEC}} = 130$ kHz, $\nu_{\text{C,DEC}} = 3.6$ kHz, $\nu_{\text{N,DEC}} = 3.6$ kHz, $\nu_{\text{MAS}} = 20$ kHz, $\nu_{\text{C}} = 62.5$ kHz, $T_{\text{bearing}} = 278$ K, $\delta_{\text{H}_2\text{O}} = 4.89$ ppm.                                                                                              | 2-3 days per sample          |
| 2D J-hNH                                                       | $B_0 = 14.1$ T, ns = 64 to 160, $\tau_{\text{rd}} = 1.5$ s, $\tau_{\text{dw}} = 15$ $\mu\text{s}$ , $\tau_{\text{acq}} = 92.2$ ms, $t_{1,\text{inc}} = 274$ $\mu\text{s}$ , $t_{1,\text{max}} = 70.2$ ms, $\tau_{\text{INEPT}} = 10$ ms, $\tau_{\text{MISSISSIPPI}} = 0.3$ s, $\nu_{\text{H,DEC}} = 130$ kHz, $\nu_{\text{C,DEC}} = 3.6$ kHz, $\nu_{\text{N,DEC}} = 3.6$ kHz, $\nu_{\text{MAS}} = 20$ kHz, $T_{\text{bearing}} = 293$ K, $\delta_{\text{H}_2\text{O}} = 4.77$ ppm.                                                                                                                                                                                                       | ~2 days per sample           |
| 2D dipolar hNH                                                 | $B_0 = 18.8$ T (Heparin-4R <sup>NC</sup> , [AD]4R <sup>NC</sup> ) or 14.1 T (others), ns = 400 to 600, $\tau_{\text{rd}} = 1.5$ s, $\tau_{\text{dw}} = 15$ $\mu\text{s}$ , $\tau_{\text{acq}} = 38.4$ ms, $t_{1,\text{inc}} = 225$ $\mu\text{s}$ (Heparin-4R <sup>NC</sup> , [AD]4R <sup>NC</sup> ) or 300 $\mu\text{s}$ (others), $t_{1,\text{max}} = 30$ ms, $\tau_{\text{HN}} = 1250$ $\mu\text{s}$ , $\tau_{\text{NH}} = 400$ $\mu\text{s}$ , $\tau_{\text{MISSISSIPPI}} = 0.3$ s, $\nu_{\text{H,DEC}} = 10$ kHz, $\nu_{\text{C,DEC}} = 10$ kHz, $\nu_{\text{N,DEC}} = 10$ kHz, $\nu_{\text{MAS}} = 55$ kHz, $T_{\text{bearing}} = 250$ K, $\delta_{\text{H}_2\text{O}} = 4.89$ ppm. | 2-3 days per sample          |
| 3D hCANH                                                       | $B_0 = 14.1$ T, ns = 24, $\tau_{\text{rd}} = 1.5$ s, $\tau_{\text{dw}} = 15$ $\mu\text{s}$ , $\tau_{\text{acq}} = 38.4$ ms, $t_{1,\text{inc}} = 160$ $\mu\text{s}$ , $t_{1,\text{max}} = 4.8$ ms, $t_{2,\text{inc}} = 300$ $\mu\text{s}$ , $t_{2,\text{max}} = 10.5$ ms, $\tau_{\text{HC}} = 2$ ms, $\tau_{\text{CN}} = 8$ ms, $\tau_{\text{NH}} = 400$ $\mu\text{s}$ , $\tau_{\text{MISSISSIPPI}} = 0.2$ s, $\nu_{\text{H,DEC}} = 10$ kHz, $\nu_{\text{H,CN}} = 0$ kHz, $\nu_{\text{C,DEC}} = 10$ kHz, $\nu_{\text{N,DEC}} = 10$ kHz, $\nu_{\text{MAS}} = 55$ kHz, $T_{\text{bearing}} = 247$ K, $\delta_{\text{H}_2\text{O}} = 4.89$ ppm.                                              | 2 days                       |
| 3D hCA(co)NH                                                   | $B_0 = 14.1$ T, ns = 40, $\tau_{\text{rd}} = 1.5$ s, $\tau_{\text{dw}} = 15$ $\mu\text{s}$ , $\tau_{\text{acq}} = 23.0$ ms, $t_{1,\text{inc}} = 160$ $\mu\text{s}$ , $t_{1,\text{max}} = 4.8$ ms, $t_{2,\text{inc}} = 300$ $\mu\text{s}$ , $t_{2,\text{max}} = 10.5$ ms, $\tau_{\text{HC}} = 2$ ms, $\tau_{\text{DREAM}} = 8$ ms, $\tau_{\text{CN}} = 8$ ms, $\tau_{\text{NH}} = 400$ $\mu\text{s}$ , $\tau_{\text{MISSISSIPPI}} = 0.2$ s, $\nu_{\text{H,DEC}} = 10$ kHz, $\nu_{\text{H,CN}} = 0$ kHz, $\nu_{\text{C,DEC}} = 10$ kHz, $\nu_{\text{N,DEC}} = 10$ kHz, $\nu_{\text{MAS}} = 55$ kHz, $T_{\text{bearing}} = 247$ K, $\delta_{\text{H}_2\text{O}} = 4.89$ ppm.                | 3.5 days                     |

Definitions of symbols:  $B_0$  = magnetic field; ns = number of scans per free induction decay;  $\tau_{\text{rd}}$  = recycle delay;  $t_{1,\text{max}}$  = maximum  $t_1$  evolution time;  $t_{1,\text{inc}}$  =  $t_1$  increment;  $t_{2,\text{max}}$  = maximum  $t_2$  evolution time;  $t_{2,\text{inc}}$  =  $t_2$  increment;  $\tau_{\text{dw}}$  = dwell-time in the direct dimension;  $\tau_{\text{acq}}$  = maximum acquisition time in the direct dimension;  $\nu_{\text{X,DEC}}$  = X channel ( $^1\text{H}$ ,  $^{13}\text{C}$  or  $^{15}\text{N}$ ) rf field strength for decoupling during acquisition;  $\nu_{\text{H,CN}}$  =  $^1\text{H}$  rf field strength for decoupling during  $^{13}\text{C}$ - $^{15}\text{N}$  SPECIFIC-CP;  $T_{\text{bearing}}$  = thermocouple-reported bearing gas temperature;  $\delta_{\text{H}_2\text{O}}$  =  $^1\text{H}$  chemical shift of water;  $\nu_{\text{MAS}}$  = MAS frequency;  $\tau_{\text{HX}}$  =  $^1\text{H}$ -X cross polarization contact time;  $\tau_{\text{CN}}$  =  $^{13}\text{C}$ - $^{15}\text{N}$  SPECIFIC-CP contact time;  $\tau_{\text{DREAM}}$  =  $^{13}\text{C}$ - $^{13}\text{C}$  DREAM contact time;  $\tau_{\text{NH}}$  =  $^{15}\text{N}$ - $^1\text{H}$  cross polarization contact time;  $\tau_{\text{MISSISSIPPI}}$  = duration of MISSISSIPPI solvent suppression period,  $\tau_{\text{REDOR}}$  =  $^{15}\text{N}$ - $^{13}\text{C}$  REDOR mixing time;  $\nu_{\text{C}}$  =  $^{13}\text{C}$  rf field strength for  $180^\circ$  pulses during REDOR.

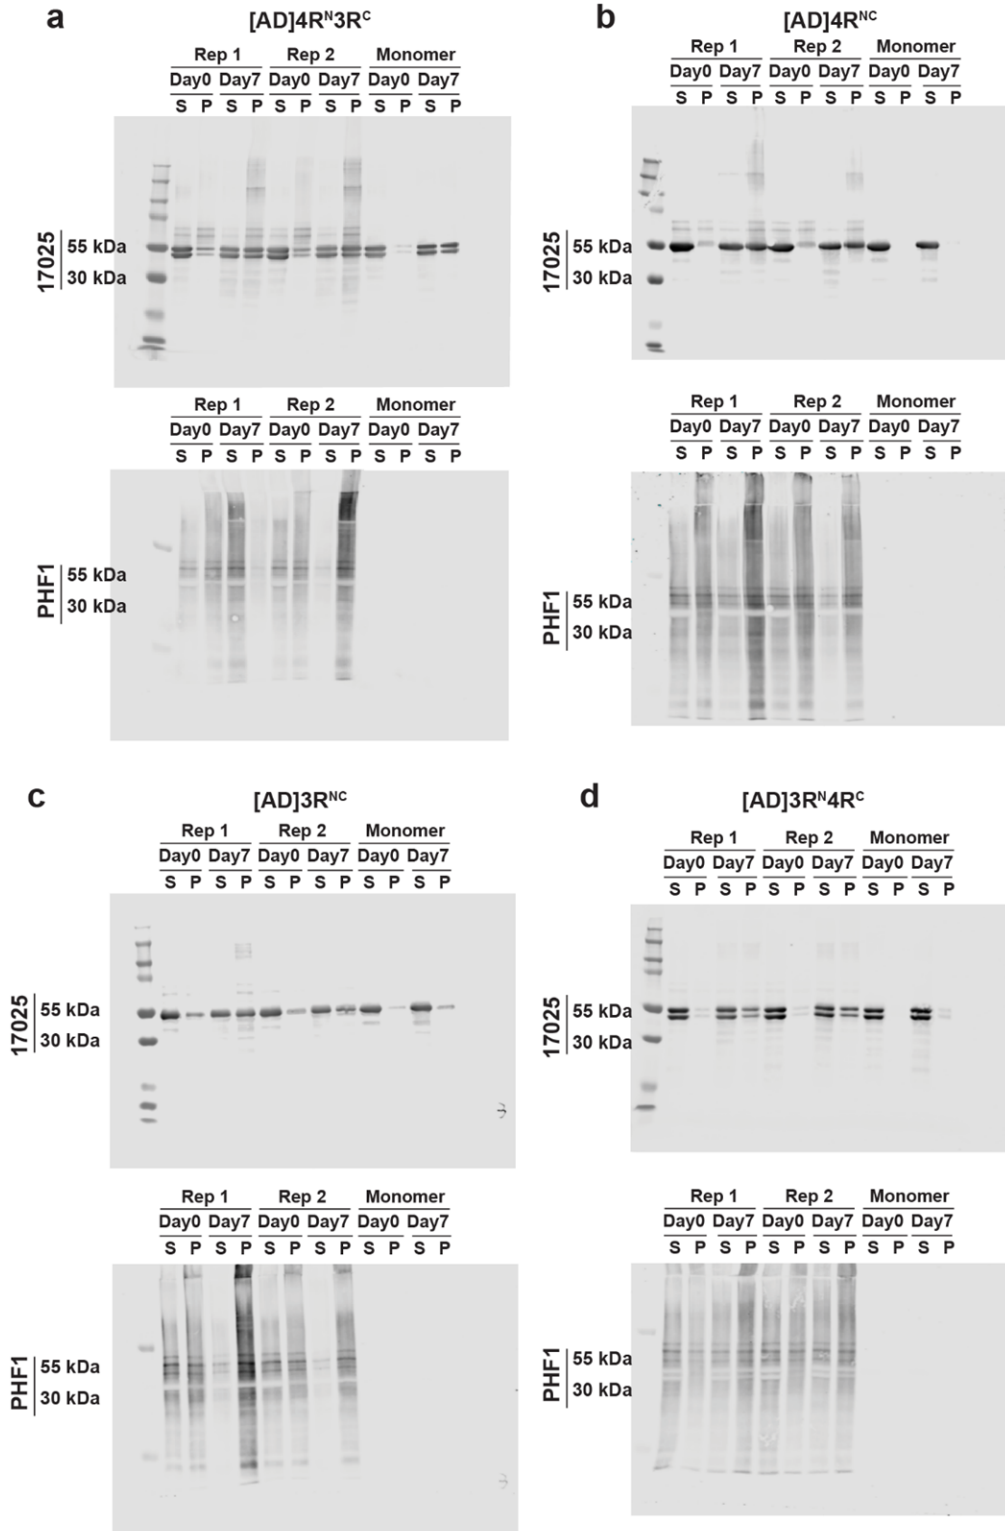

**Supplementary Fig. 1.** Full Western Blot images from Fig. 2a. Tau species in (a) [AD]4R<sup>N3R<sup>C</sup></sup>, (b) [AD]4R<sup>NC</sup>, (c) [AD]3R<sup>NC</sup> and (d) [AD]3R<sup>N4R<sup>C</sup></sup> were revealed by the 17025 anti-total tau antibody and PHF1 anti-phospho-tau antibody.

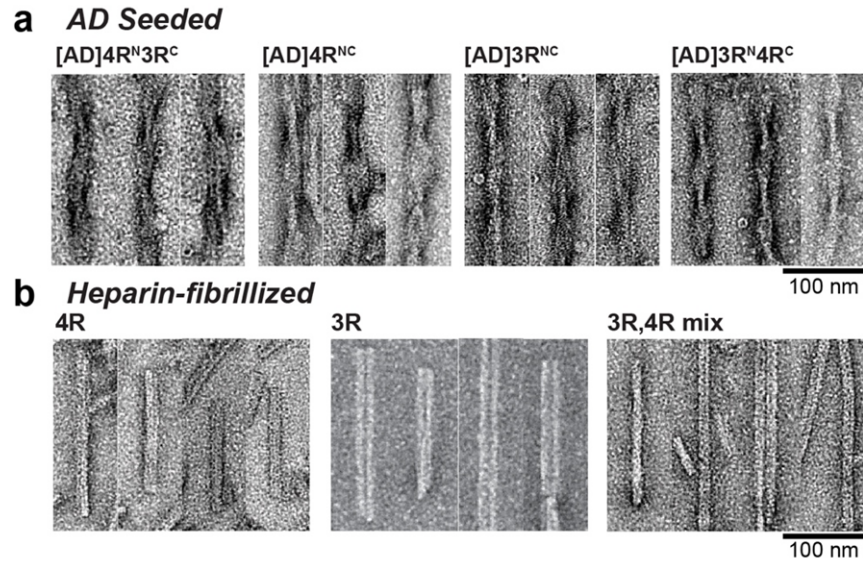

**Supplementary Fig. 2. TEM Images of tau filaments aligned for comparison. (a)** The majority of fibrils in AD-seeded samples are twisted filaments that have uniform width and crossover distance, and that match the dimensions previously reported for AD paired-helical filaments (PHF)<sup>45</sup>. **(b)** Heparin-fibrillized tau containing 4R tau only, 3R tau only, and both 4R and 3R tau. These fibrils are nearly exclusively straight and are distinct from AD seeded tau filaments. At least five different images from different regions of each grid were obtained for each sample.

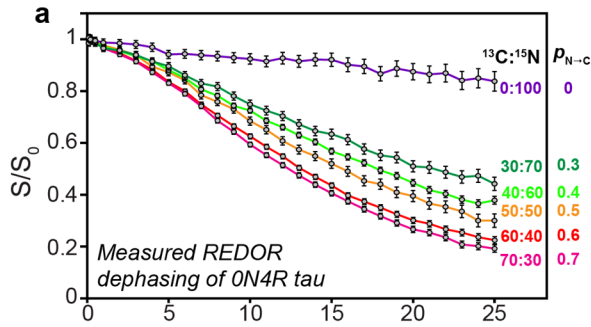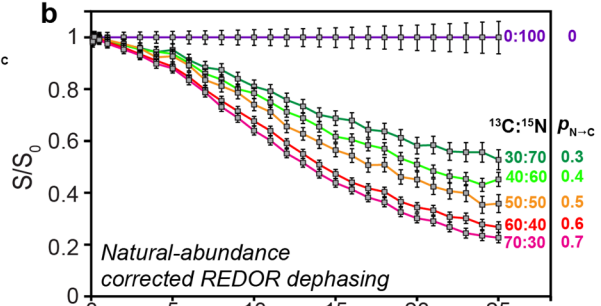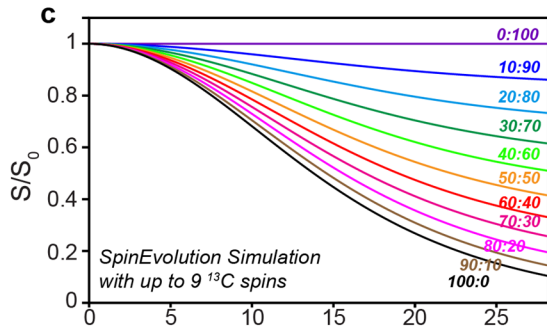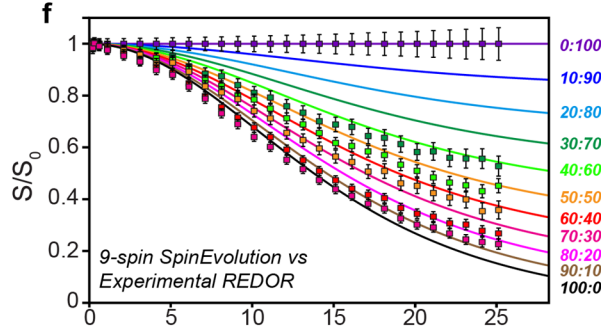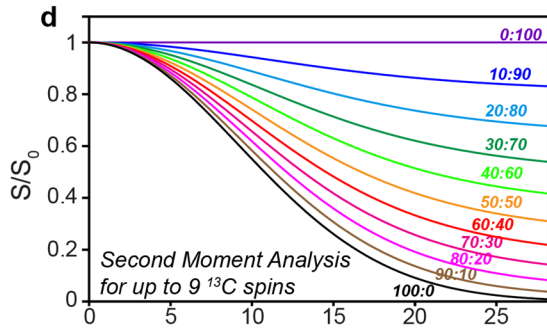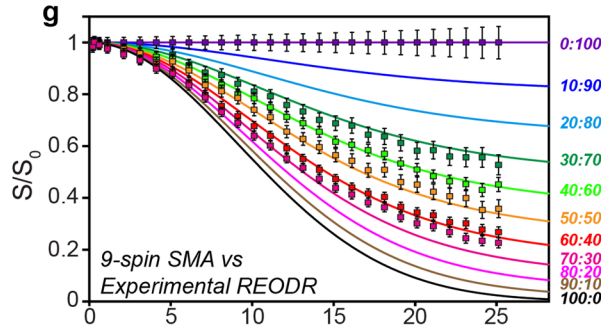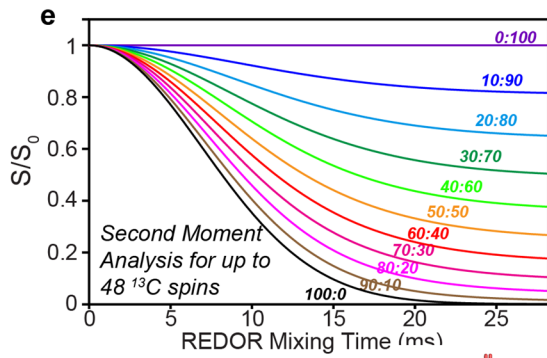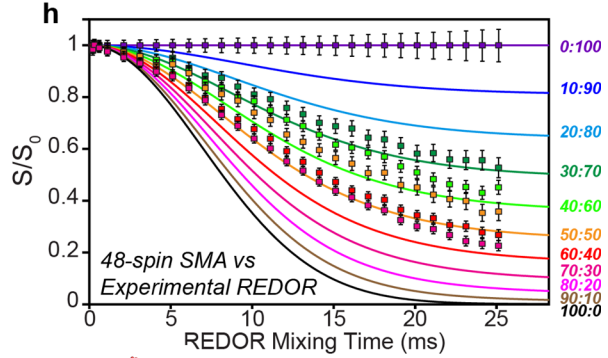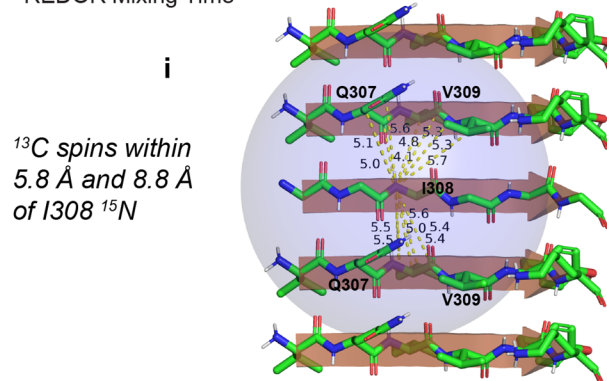

**Supplementary Fig. 3. Measured and simulated  $^{15}\text{N}$ - $^{13}\text{C}$  REDOR dephasing curves of mixed labeled 0N4R tau with varying ratios of  $^{13}\text{C}$ ,  $^2\text{H}$ -labeled protein and  $^{15}\text{N}$ ,  $^2\text{H}$ -labeled protein.** (a) Measured REDOR dephasing of  $^{13}\text{C}$  and  $^{15}\text{N}$  mixed labeled 0N4R tau with varying mixing ratios, reproduced from Fig. 3e. Natural abundance  $^{13}\text{C}$  dephasing to  $^{15}\text{N}$ -labeled protein is present in these data. Error bars represent the propagated uncertainty from the spectral signal-to-noise ratios. (b)  $^{13}\text{C}$  natural-abundance corrected REDOR data, obtained by dividing the measured  $S/S_0$  values of each sample by the  $S/S_0$  values of the 100%  $^{15}\text{N}$ -labeled tau. Error bars represent the propagated uncertainty from the spectral signal-to-noise ratios. (c) SpinEvolution simulation using up to 9 nearest  $^{13}\text{C}$  spins to the I308 amide  $^{15}\text{N}$ . The natural abundance  $^{13}\text{C}$  nuclei in the  $^{15}\text{N}$ -labeled monomer are ignored in these simulations. (d) Second moment analysis (SMA) of REDOR dephasing using the same  $^{13}\text{C}$  spins as in (b). (e) Second moment analysis of REDOR dephasing using the nearest 48  $^{13}\text{C}$  spins within 8.8 Å of the  $^{15}\text{N}$  nucleus. The second moment simulations ignore  $^{13}\text{C}$  finite-pulse effects,  $^{13}\text{C}$  isotropic and anisotropic chemical shifts, and  $^{13}\text{C}$ - $^{13}\text{C}$  dipolar couplings. (f-h) overlay of the measured natural-abundance corrected REDOR data in (b) with the SpinEvolution simulation (c) and second moment analysis (d-e). (i)  $^{13}\text{C}$  spins within 5.8 Å (dashed lines) or 8.8 Å (purple sphere) of I308 amide  $^{15}\text{N}$  in the cryoEM structure of AD PHF tau (PDB: [5O3L](#))<sup>4</sup>. The two neighboring chains that sandwich the central chain with an I308  $^{15}\text{N}$  label are  $^{13}\text{C}$ -labeled either in one or both chains.



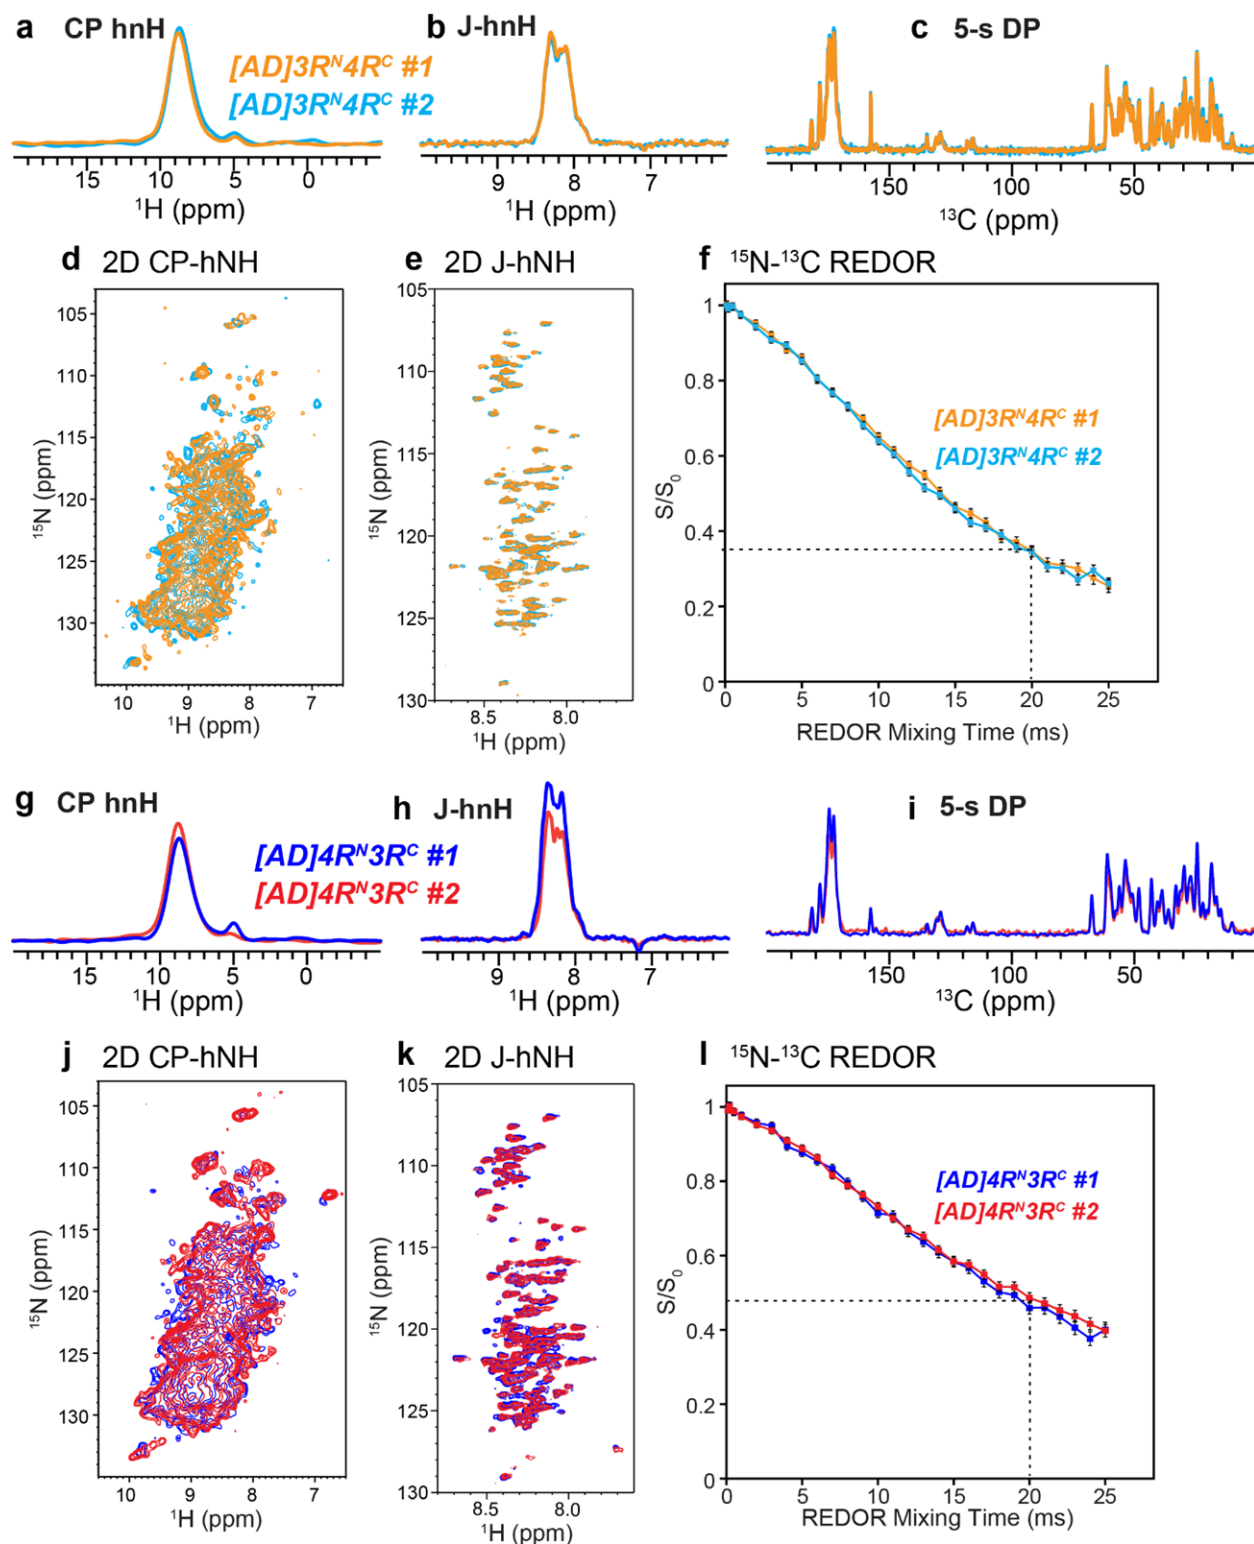

**Supplementary Fig. 4. AD seeded mixed isoform tau filaments have highly reproducible structure and dynamics.** (a-f) Comparisons of the fingerprint spectra and REDOR data of two independent samples of AD-seeded  $^{15}\text{N}$ -labeled 3R tau mixed with  $^{13}\text{C}$ -labeled 4R tau (1:1). (g-l) Comparisons of fingerprint spectra and REDOR data of two independent AD seeded  $^{15}\text{N}$ -labeled 4R tau mixed with  $^{13}\text{C}$ -labeled 3R tau (1:1). Each sample was seeded separately using separately

purified tau monomers. **(a-c)** 1D CP-hnH, J-hnH, and  $^{13}\text{C}$  DP MAS spectra of duplicates #1 and #2 of  $[\text{AD}]_3\text{R}^{\text{N}}_4\text{R}^{\text{C}}$  tau. **(d-e)** 2D CP-hNH and J-hNH spectra of the same duplicates. **(f)**  $^1\text{H}$ -detected  $^{15}\text{N}$ - $^{13}\text{C}$  REDOR dephasing of the duplicates. Similar comparisons between the duplicates of  $[\text{AD}]_4\text{R}^{\text{N}}_3\text{R}^{\text{C}}$  are shown in **(g-l)**.

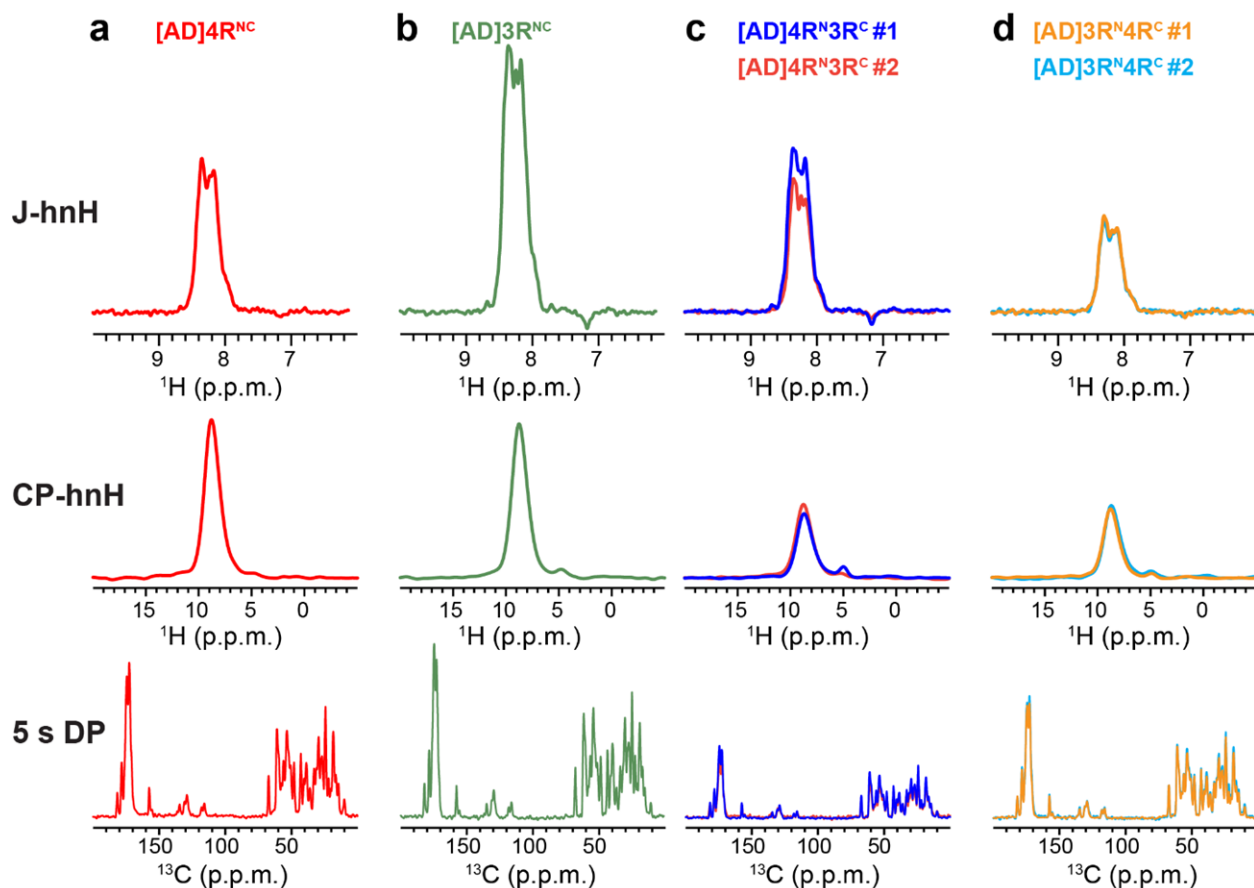

**Supplementary Fig. 5.** 1D  $^1\text{H}$ -detected J-hnH spectra,  $^1\text{H}$ -detected CP-hnH spectra, and  $^{13}\text{C}$  DP-MAS spectra of AD-tau seeded tau filaments for quantification of 4R and 3R tau incorporation levels into the filaments. (a)  $[\text{AD}]4\text{R}^{\text{NC}}$  sample. (b)  $[\text{AD}]3\text{R}^{\text{NC}}$  sample. (c) Duplicates #1 and #2 of  $[\text{AD}]4\text{R}^{\text{N}}3\text{R}^{\text{C}}$  sample, which contains a 1:1 mixture of  $^{15}\text{N}$ ,  $^2\text{H}$ -labeled 0N4R tau and  $^{13}\text{C}$ ,  $^2\text{H}$ -labeled 0N3R tau. (d) Duplicates #1 and #2 of  $[\text{AD}]4\text{R}^{\text{N}}3\text{R}^{\text{C}}$  sample, which contains a 1:1 mixture of  $^{15}\text{N}$ ,  $^2\text{H}$ -labeled 0N3R tau and  $^{13}\text{C}$ ,  $^2\text{H}$ -labeled 0N4R tau.

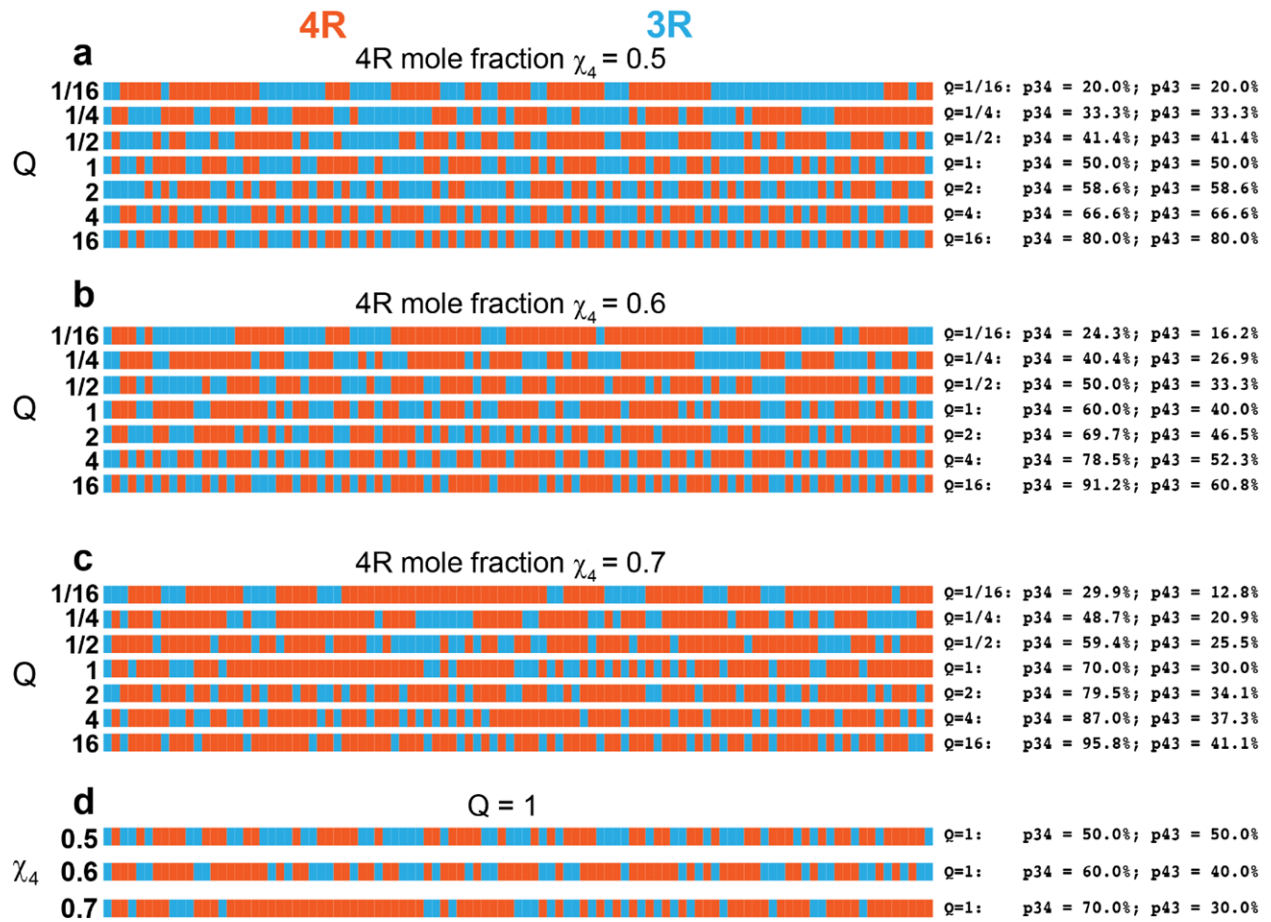

**Supplementary Fig. 6.** Simulated fibril mixing schemes for varying mole fractions of 4R tau ( $\chi_4$ ) and mixing quotients Q. Individual 100-monomer fibrils made of 3R (blue) or 4R (orange) monomers are shown; each monomer is a vertical line. **(a)** Simulated mixing as a function of Q for  $\chi_4 = 0.5$ . **(b)** Simulated mixing as a function of Q for  $\chi_4 = 0.6$ . **(c)** Simulated mixing as a function of Q for  $\chi_4 = 0.7$ . **(d)** Simulated mixing as a function of  $\chi_4$  for Q = 1.

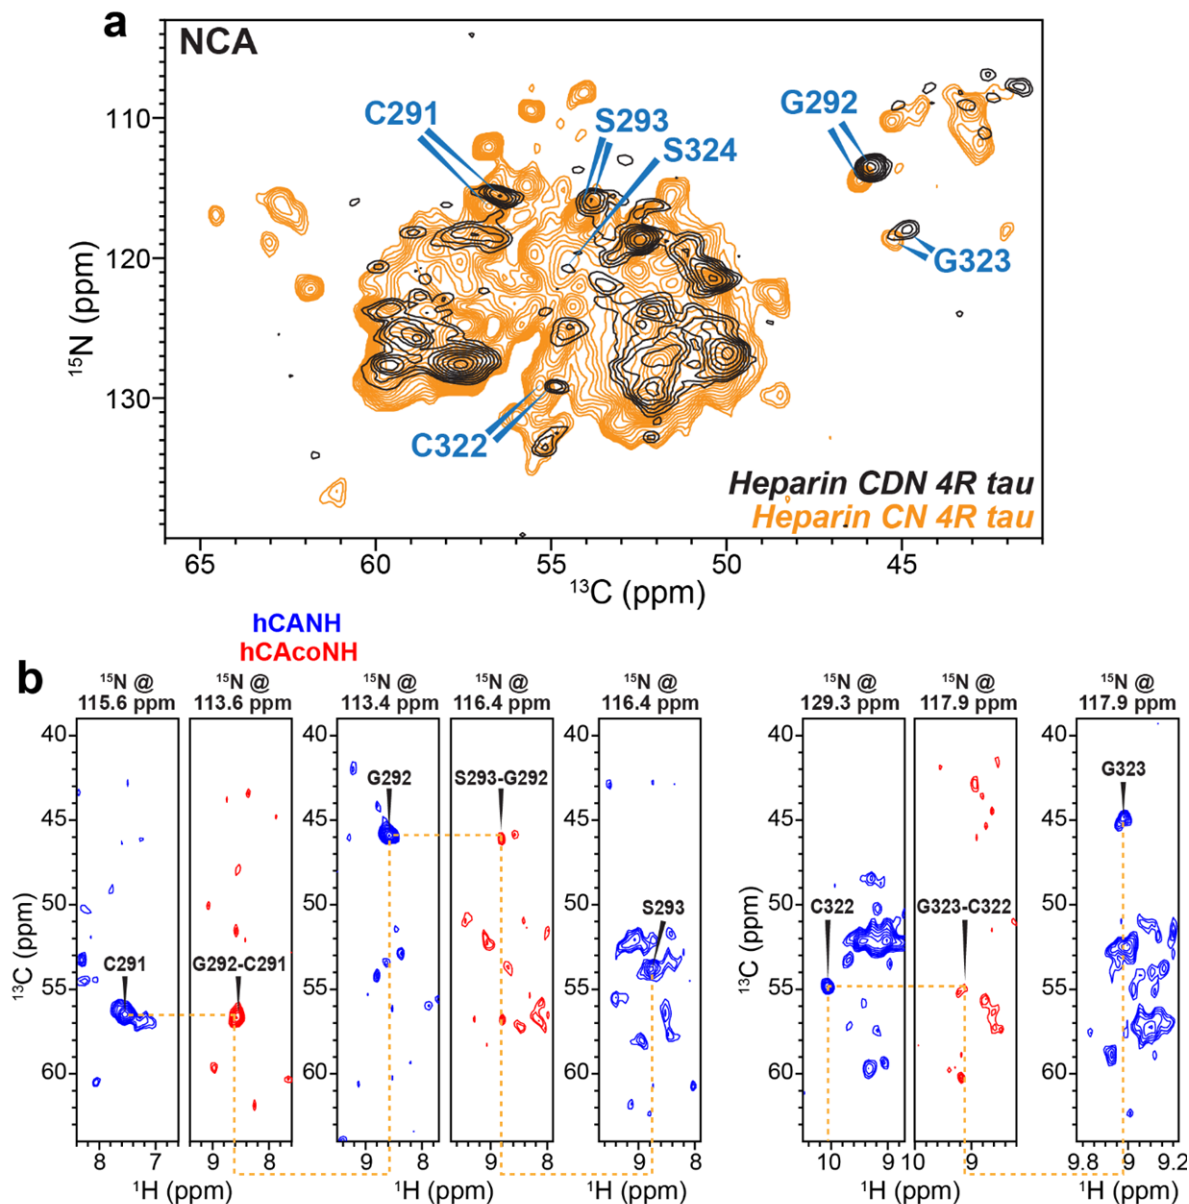

**Supplementary Fig. 7.** Assignment of residues  $^{291}\text{CGS}^{293}$  and  $^{322}\text{CGS}^{294}$  in heparin-fibrillized  $4\text{R}^{\text{NC}}$  tau based on 3D hCANH and hCA(co)NH spectra. **(a)** 2D NC projection from the 3D hCANH spectrum of the heparin-fibrillized CDN-labeled 4R tau (black), overlaid with the previously reported 2D NCA spectrum of heparin-fibrillized CN-labeled 4R tau (orange)<sup>21</sup>. Residues  $^{291}\text{CGS}^{293}$  and  $^{322}\text{CGS}^{294}$  in both spectra are marked in cyan. The small chemical shift differences between the two samples can be attributed to deuterium isotope effects and slight difference in experimental temperatures. **(b)** CAH strips extracted at the  $^{15}\text{N}$  chemical shifts of residues  $^{291}\text{CGS}^{293}$  and  $^{322}\text{CG}^{293}$  from 3D the hCANH (blue) and hCA(co)NH (red) spectra of the CDN-labeled 4R tau sample. Residues  $^{291}\text{CGS}^{293}$  and  $^{322}\text{CG}^{323}$  have the strongest peak intensities in these 3D  $^1\text{H}$ -detected spectra, consistent with the observation of CN-labeled 4R tau sample in previously reported  $^{13}\text{C}$ -detected 3D spectra<sup>21</sup>.
