# Supplementary material for: Fluent molecular mixing of Tau isoforms in Alzheimer’s disease neurofibrillary tangles
Source: PubMed Central journal article supplement (PMC9142584; doi:10.1038/s41467-022-30585-0), 2022-05-27
Supplement: 41467_2022_30585_MOESM3_ESM.pdf [file 41467_2022_30585_MOESM3_ESM.pdf]

# Source Codes for

## Fluent Molecular Mixing of Tau Isoforms in Alzheimer's Disease Neurofibrillary Tangles

Aurelio J. Dregni<sup>1§</sup>, Pu Duan<sup>1§</sup>, Hong Xu<sup>2</sup>, Lakshmi Changolkar<sup>2</sup>, Nadia El Mammeri<sup>1</sup>, Virginia M.-Y. Lee<sup>2</sup>, and Mei Hong<sup>1\*</sup>

<sup>1</sup> Department of Chemistry, Massachusetts Institute of Technology, 170 Albany Street,  
Cambridge, MA 02139

<sup>2</sup> Department of Pathology and Laboratory Medicine, Institute On Aging and Center for  
Neurodegenerative Disease Research, University of Pennsylvania School of Medicine,  
Philadelphia, PA, 19104, USA

\* Corresponding author: Mei Hong: [meihong@mit.edu](mailto:meihong@mit.edu)

§ These authors contributed equally to this work.

## SpinEvolution Source Code for REDOR simulation

SpinEvolution Code for the case of  $^{13}\text{C}$ -chain  $\rightarrow$   $^{15}\text{N}$ -chain  $\rightarrow$   $^{13}\text{C}$ -chain:

\*\*\*\*\* The System \*\*\*\*\*

```
spectrometer(MHz) 600
spinning_freq(kHz) 20.0
channels          N15 C13
nuclei            N15 C13 C13 C13 C13 C13 C13 C13 C13 C13
atomic_coords    I308_5p55_343.txt
cs_isotropic     0 -47 70 -65 -40 70 -82 -40 -62 -75 ppm
csa_parameters   1 0 0 0 0 ppm
csa_parameters   2 30 0 10 45 0 ppm
csa_parameters   3 170 0 90 30 0 ppm
csa_parameters   4 30 0 50 10 0 ppm
csa_parameters   5 30 0 80 60 0 ppm
csa_parameters   6 170 0 5 20 0 ppm
csa_parameters   7 30 0 49 10 0 ppm
csa_parameters   8 30 0 25 60 0 ppm
csa_parameters   9 30 0 50 20 0 ppm
csa_parameters  10 30 0 30 20 0 ppm
j_coupling      *
quadrupole      *
dip_switchboard *
csa_switchboard *
exchange_nuclei *
bond_len_nuclei *
bond_ang_nuclei *
tors_ang_nuclei *
groups_nuclei  *
```

\*\*\*\*\* REDOR Pulse Sequence \*\*\*\*\*

```
CHN 1
timing(usec)    (50)512  42  8  50  (50)512
power(kHz)     0      0 62.5 0      0
phase(deg)     0      0  0  0      0
freq_offs(kHz) 0      0  0  0      0
CHN 2
timing(usec)    (redor.pp) 17 8 25 redor.pp (redor.pp)
power(kHz)     *      0 62.5 0      *      *
phase(deg)     *      0  0  0      *      *
freq_offs(kHz) *      0  0  0      *      *
```

\*\*\*\*\* Variables \*\*\*\*\*

```
scan_par1d rf/62.5:-1.74:52.06/
power_2_1_2 = rf
power_2_1_4 = rf
power_2_2_2 = rf
power_2_2_5 = rf
power_2_2_7 = rf
power_2_3_2 = rf
power_2_3_4 = rf
```

\*\*\*\*\* Options \*\*\*\*\*

```
rho0          I1x
observables   I1p
EulerAngles   rep30
```

n\_gamma \*  
line\_broaden(Hz) \*  
zerofill \*  
FFT\_dimensions \*  
options -dw123 -re

**“atomic\_coords” file for the case of <sup>13</sup>C-chain → <sup>15</sup>N-chain → <sup>13</sup>C-chain:**

|                       |     |     |       |                   |
|-----------------------|-----|-----|-------|-------------------|
| 130.013103.502142.851 | N   | ILE | F     | 0                 |
| 129.061101.533138.265 | CA  | GLN | below | 5.080813025       |
| 130.095102.462138.877 | C   | GLN | below | 4.108649413       |
| 127.663102.083138.528 | CB  | GLN | below | 5.120975493       |
| 131.652104.3          |     | CA  | ILE   | below 4.771920473 |
| 130.98                |     | C   | ILE   | below 5.325126665 |
| 128.329107.077139.319 | CG2 | VAL | below | 5.300141979       |
| 130.205104.843148.098 | CA  | ILE | Above | 5.419054715       |
| 131.602104.671147.465 | CB  | ILE | above | 5.018015345       |
| 132.221103.35         |     | CG1 | ILE   | above 5.530189147 |
| 147.919               |     |     |       |                   |

## SpinEvolution Code for the case of $^{13}\text{C}$ -chain $\rightarrow$ $^{15}\text{N}$ -chain $\rightarrow$ $^{15}\text{N}$ -chain:

```
***** The System *****
spectrometer(MHz) 600
spinning_freq(kHz) 20.0
channels          N15 C13
nuclei            N15 C13 C13 C13 C13 C13
atomic_coords     I308_5p8_344.txt
cs_isotropic      0 -40 70 -60 -85 -90 ppm
csa_parameters    1 0 0 0 0 0 ppm
csa_parameters    2 30 0 10 45 0 ppm
csa_parameters    3 170 0 90 30 0 ppm
csa_parameters    4 30 0 50 10 0 ppm
csa_parameters    5 30 0 80 60 0 ppm
csa_parameters    6 30 0 5 20 0 ppm
j_coupling        *
quadrupole        *
dip_switchboard  *
csa_switchboard  *
exchange_nuclei  *
bond_len_nuclei  *
bond_ang_nuclei  *
tors_ang_nuclei  *
groups_nuclei    *
***** REDOR Pulse Sequence *****
CHN 1
timing(usec)      (50)512 42 8 50 (50)512
power(kHz)        0 0 62.5 0 0
phase(deg)        0 0 0 0 0
freq_offs(kHz)    0 0 0 0 0
CHN 2
timing(usec)      (redor.pp) 17 8 25 redor.pp (redor.pp)
power(kHz)        * 0 62.5 0 * *
phase(deg)        * 0 0 0 * *
freq_offs(kHz)    * 0 0 0 * *
***** Variables *****
scan_par1d rf/62.5:-1.74:52.06/
power_2_1_2 = rf
power_2_1_4 = rf
power_2_2_2 = rf
power_2_2_5 = rf
power_2_2_7 = rf
power_2_3_2 = rf
power_2_3_4 = rf
***** Options *****
rho0              I1x
observables       I1p
EulerAngles       rep30
n_gamma           *
line_broaden(Hz) *
zerofill          *
FFT_dimensions    *
options           -dw123 -re
```

**“atomic\_coords” file for the case of  $^{13}\text{C}$ -chain  $\rightarrow$   $^{15}\text{N}$ -chain  $\rightarrow$   $^{15}\text{N}$ -chain:**

|                       |         |    |     |       |                   |
|-----------------------|---------|----|-----|-------|-------------------|
| 130.013103.502142.851 |         | N  | ILE | F     | 0                 |
| 130.205104.843148.098 |         | CA | ILE | Above | 5.419054715       |
| 129.585106.179147.718 |         | C  | ILE | above | 5.571104199       |
| 131.602104.671147.465 |         | CB | ILE | above | 5.018015345       |
| 132.221103.35         | 147.919 |    | CG1 | ILE   | above 5.530189147 |
| 133.458102.93         | 147.167 |    | CD1 | ILE   | above 5.551852394 |

# SpinEvolution Code for the case of $^{15}\text{N}$ -chain $\rightarrow$ $^{15}\text{N}$ -chain $\rightarrow$ $^{13}\text{C}$ -chain:

\*\*\*\*\* The System \*\*\*\*\*

```
spectrometer(MHz) 600
spinning_freq(kHz) 20.0
channels          N15 C13
nuclei            N15 C13 C13 C13 C13 C13 C13 C13 C13
atomic_coords    I308_5p8_443.txt
cs_isotropic     0 -47 70 -65 -67 -40 75 -70 -82 ppm
csa_parameters   1 0 0 0 0 0 ppm
csa_parameters   2 30 0 10 45 0 ppm
csa_parameters   3 170 0 90 30 0 ppm
csa_parameters   4 30 0 50 10 0 ppm
csa_parameters   5 30 0 80 60 0 ppm
csa_parameters   6 30 0 5 20 0 ppm
csa_parameters   7 170 0 49 10 0 ppm
csa_parameters   8 30 0 25 60 0 ppm
csa_parameters   9 30 0 50 20 0 ppm
j_coupling      *
quadrupole      *
dip_switchboard *
csa_switchboard *
exchange_nuclei *
bond_len_nuclei *
bond_ang_nuclei *
tors_ang_nuclei *
groups_nuclei  *
```

\*\*\*\*\* REDOR Pulse Sequence \*\*\*\*\*

CHN 1

```
timing(usec)   (50)512 42 8 50 (50)512
power(kHz)    0 0 62.5 0 0
phase(deg)    0 0 0 0 0
freq_offs(kHz) 0 0 0 0 0
```

CHN 2

```
timing(usec) (redor.pp) 17 8 25 redor.pp (redor.pp)
power(kHz)  * 0 62.5 0 * *
phase(deg)  * 0 0 0 * *
freq_offs(kHz) * 0 0 0 * *
```

\*\*\*\*\* Variables \*\*\*\*\*

scan\_par1d rf/62.5:-1.74:52.06/

```
power_2_1_2 = rf
power_2_1_4 = rf
power_2_2_2 = rf
power_2_2_5 = rf
power_2_2_7 = rf
power_2_3_2 = rf
power_2_3_4 = rf
```

\*\*\*\*\* Options \*\*\*\*\*

```
rho0          I1x
observables   I1p
EulerAngles   rep30
n_gamma       *
line_broaden(Hz) *
zerofill      *
FFT_dimensions *
options       -dw123 -re
```

**“atomic\_coords” file for the case of <sup>13</sup>C-chain → <sup>15</sup>N-chain → <sup>15</sup>N-chain:**

|                       |     |     |       |                   |
|-----------------------|-----|-----|-------|-------------------|
| 130.013103.502142.851 | N   | ILE | F     | 0                 |
| 129.061101.533138.265 | CA  | GLN | below | 5.080813025       |
| 130.095102.462138.877 | C   | GLN | below | 4.108649413       |
| 127.663102.083138.528 | CB  | GLN | below | 5.120975493       |
| 127.402103.439137.901 | CG  | GLN | below | 5.59676603        |
| 131.652104.3          |     | CA  | ILE   | below 4.771920473 |
| 130.98                |     | C   | ILE   | below 5.325126665 |
| 129.384108.127139.63  |     | CB  | VAL   | below 5.671076353 |
| 128.329107.077139.319 | CG2 | VAL | below | 5.300141979       |



**SpinEvolution pulse sequence file “redor.pp”:**

```
17 0 0 0
8 62.5 0 0
17 0 0 0
8 62.5 90 0
```

## Bruker Topspin 3.5 pulse program code for <sup>1</sup>H-detected <sup>15</sup>N-<sup>13</sup>C REDOR

```
;1H detected 15N{13C} REDOR
;Avance III version
;f1 : H
;f2 : N
;f3 : C
;o1 : H offset, on resonance with water peak (~5 ppm, water suppression!)
;o2 : N offset, center of 15N signal (~119 ppm)
;o3 : C offset, center of 13C signal (~100 ppm, using '-DTC')
;p3 : H 90 hard pulse at pl2
;p21 : N 90 hard pulse at pl21
;p22 : N 180 hard pulse at pl21
;p33 : C 180 hard pulse at pl3 for redor
;p25 : HN CP at sp42 (H) & sp43 (N), (~1 to 3 ms)
;p45 : NH CP at sp46 (H) & sp47 (N), (~400 to 800 us)
;pl2 : H hard pulse power
;pl3 : C hard pL for REDOR
;pl12 : H dec power ('tppm15' at >70 kHz for <14 kHz MAS; 'waltz16_12nofq' at ~10 kHz for fast MAS)
;pl13 : H dec power during H2O suppression (~15 kHz, 'cwX_13nofq', 'cwY_13nofq')
;pl16 : N dec power ('waltz16_16nofq' at ~7 kHz)
;pl18 : C dec power ('waltz16_18nofq' at ~7 kHz, using '-DTC')
;pl21 : N hard pulse power (can be optimized with '-DN90')
;sp42 : H HN CP power
;sp43 : N HN CP power
;sp46 : H NH CP power
;sp47 : N NH CP power
;d1 : recycle delay; 1 to 5 times T1 (~0.8 to 1 s)
;d19 : delay for water suppression (~100 to 300 ms)
;d5: Total REDOR time, tune by l10
;cpdprg1 : H dec ('tppm15' at >70 kHz for <14 kHz MAS; 'waltz16_12nofq' at ~10 kHz for fast MAS)
;cpdprg2 : N dec ('waltz16_16nofq' at pl16 (10 kHz))
;cpdprg3 : C dec ('waltz16_18nofq' at pl18 (10 kHz), using '-DTC')
;cpdprg4 : H Water suppression along X ('cwX_13nofq' at pl13 (15 kHz))
;cpdprg5 : H Water suppression along Y ('cwY_13nofq' at pl13 (15 kHz))
;pcpd1 : H dec pulse
;pcpd2 : N dec pulse: 35.35 us ('waltz16_16nofq' ~7 kHz)
;pcpd3 : C dec pulse: 35.35 us ('waltz16_18nofq' ~7 kHz, using '-DTC')
;spnam42 : H shape (ramp up for NH CP, e.g. 'ramp.70100.1000')
;spnam43 : N shape (e.g. 'square.1000' for HN CP (=no shape))
;spnam46 : H shape (ramp down for NH CP, e.g. 'ramp.10070.1000')
;spnam47 : N shape (e.g. 'square.1000' for NH CP (=no shape))
;inf1 : 1/SW(N) = 2 * DW(N)
;in0 : = inf1
;l31: spinning speed in Hz
;l10 : REDOR mix = L10*tr, must be even
;ZGOPTNS : -DTC : switch on C decoupling
; -DN90: N 90 degree pulse check
; or blank
;FnMODE : States-TPPI
;ns : MIN. 4 (full: 8)
;ds : 2 or 4

#####
;# hNHREDOR #
;# Dregni, Duan... Hong, Nature Communications 2022 #
```

```

#####

;$COMMENT=1H detected 15N{13C} REDOR
;$CLASS=BioSolids
;$DIM=1D
;$TYPE=H detection
;$SUBTYPE=CP, Heteronuclear

prosol relations=<biosolHCN>

#include <HNC_defs.incl>
    ; defines H:f1, N:f2, C:f3

#include <trigg.incl>
    ; definition of external trigger output

"acqt0=-(p1*2/3.1416)-0.5u"    ; baseopt correction

"spoff42=0.0"                ;#####
"spoff43=0.0"                ;#  ensure correct  #
"spoff46=0.0"                ;#  shape offsets  #
"spoff47=0.0"                ;#####

"p2=p1*2"
"p22=p21*2"

"d11=0.5s/131-p22/2"          ;to center square refocusing pulse p22
"d25=0.25s/131-1u"           ;REDOR. Used at beginning and end.
"d26=d25-p21/2"              ;Account for N flip up
"d27=0.25s/131-p33/2"       ;REDOR, altered for square timing
"d28=0.25s/131"             ;Tr/4, REDOR
"d5=110/131"

"in0=infl"                   ;#####
"d0=1u"                       ;#  t1_init => 0, 0  #
"l0=0"                        ;#####

;#####
;$EXTERN                       ;# python insertion point #
;#####

Prepare, ze

;#####
;#      Start of Active Pulse Program      #
;#####

Start, 30m do:N

#ifdef TC
    0.5u do:C
#endif    /* end of TC */

d1
d5

```

```

trigg

if "l0>0"
{
  "d51=d0-1u"
}

#####
;#      Initial excitation & HN CP      #
#####

(p3 pl2 ph1):H

(p25:sp42 ph0):H (p25:sp43 ph2):N

;-----NC REDOR-----

1u cpds1:H                      ;composite pulse decoupling scheme for REDOR

d25 pl3:C

6 d27
p33:C ph15^
d27
lo to 6 times l10                ; L0 still must be even

d28
d11
(p22 pl21 ph10):N                ;square pulse - for nonselective applications
d11
d28

8 d27
p33:C ph15^
d27
lo to 8 times l10

d26
1u do:H

;-----End of REDOR-----

#ifdef TC
if "l0>0"
{
  1u cpds1:H
  (center (d51) (p33 pl3 ph20):C)
  0.5u do:H pl13:H
}
#else
if "l0>0"
{
  0.5u cpds1:H
  d51

```

```
0.5u do:H pl13:H
}
#endif /* end of TC */
```

```
#####
;# Water suppression #
#####
```

```
(p21 pl21 ph3):N ; brings magn. to z
```

```
0.5u cpds4:H
d19*0.25
0.5u do:H
```

```
0.5u cpds5:H
d19*0.25
0.5u do:H
```

```
0.5u cpds4:H
d19*0.25
0.5u do:H
```

```
0.5u cpds5:H
d19*0.25
0.5u do:H
```

```
(p21 pl21 ph4):N ; brings magn. to y
```

```
#####
;# 15N hard pulse optimization #
#####
```

```
#ifdef N90 ; brings magn. to z.
(p21 pl21 ph22):N
#endif /* end of N90 */
```

```
#####
;# N-H CP #
#####
```

```
(p45:sp47 ph5):N (p45:sp46 ph6):H
```

```
#####
;# Acquisition #
#####
```

```
#ifdef TC
1u cpds2:N cpds3:C
#else
0.5u pl16:N
0.5u cpds2:N
#endif /* end of TC */
```

```
gosc ph31 ;start ADC with ph31 signal routing
```

```

#ifdef TC
  1m do:C do:N
#else
  1m do:N
#endif    /* end of TC */

```

lo to Start times ns

```

30m mc #0 to Start
F1PH(calph(ph2, +90), caldel(d0, +in0) & calclc(10, 1))

```

```

HaltAcqu, 1m
exit

```

```

;#####
;#      Phase Cycle      #
;#####

```

```

ph1 = 1 3          ; 1H 90 hard pulse
ph0 = 0           ; 1H HN CP Spin lock
ph2 = 1 1 1 1 3 3 3 3 ; 15N HN CP Spin lock
ph3 = 0           ; 15N 1st 90 hard pulse (flip to z)
ph4 = 0 0 2 2     ; 15N 2nd 90 hard pulse (flip back)
ph5 = 1           ; 15N NH CP Spin lock
ph6 = 1           ; 1H NH CP Spin lock
ph10= 1 1 1 1 1 1 1 1
      3 3 3 3 3 3 3 3 ;F1 180, normal shaped pulse

```

```

ph15= 0 1 0 1     ; xy-4. F3 phase
ph31= 1 3 3 1 3 1 1 3 ; receiver

```

```

#ifdef TC
ph20= 0           ; C 180 hard pulse
#endif    /* end of TC */

```

```

#ifdef N90
ph22= 0 0 2 2     ;N hard pulse
#endif    /* end of N90 */

```

```

;#####

```

## Python Source Code for Building Fibril Model (Fig 3f, g)

```
#Simulates a N residue fibril with given p34 and p43.
#Then computes observed probabilities in the simulated fibril.
#Returns "results", a string of '3', and '4' indicating the simulated fibril.
#Also returns obsProbs: (p43 observed in sim fibril - input p43, p34 observed in sim fibril - p34)
#Repeat simulation until observed probabilities are within one percentage point of input probabilities

from random import random

p34 = 0.56
p33 = 1-p34
p43 = 0.37
p44 = 1-p43

results = '3'
N = 360
for idx in range(N):
    r = random()
    if results[-1] == '3':
        if r < p34:
            results = results + '4'
        else:
            results = results + '3'
    else:
        if r < p43:
            results = results + '3'
        else:
            results = results + '4'

print(results)
obs4 = results.count('4')
obs3 = results.count('3')
obs43 = results.count('43')
obs44 = obs4 - obs43
obs34 = results.count('34')
obs33 = obs3 - obs34
#obsProbs = (obs4/N,obs44/obs4,obs43/obs4,obs34/obs3,obs33/obs3) #p4, p44, p43, p34, p33
obsProbs = (obs43/obs4-p43,obs34/obs3-p34)
obsProbs
```

## Python Source Code for Fibril Models with Varying Q and $\chi_4$ (Supplementary Fig. 7)

```
#Simulates an N residue fibril with given chi4 and Q.  
#First computes p34 and p43 from chi4 and Q (A quadratic equation)  
#Then simulates fibril based on p34 and p43.  
#Variable "Results" is printed and contains the simulated fibril.  
#Also returns obsParams: (Chi4 observed in sim fibril, input Chi4, Q observed in sim fibril, input Q)  
#Repeat simulation until observed and input parameters are within appropriate tolerance.
```

```
from random import random  
import math as mat  
chi4 = 0.7 #macroscopic preference = p34 / (p43 + p34)  
Q = 1/16 #microscopic mixing parameter = p34 p43 / (p33 p44).  
    #Choose slightly off 1.0, as equations fail for Q=1 exactly  
W = (1-chi4)/chi4  
p34 = 1/(2*W*(Q-1)) * (Q*(1+W) - math.sqrt((Q**2)*((1+W)**2)-4*Q*W*(Q-1)))  
p43 = W*p34  
  
p33 = 1-p34  
p44 = 1-p43  
probs = (p34, p43, p33, p44)  
probs  
results = '3'  
N = 100  
for idx in range(N):  
    r = random()  
    if results[-1] == '3':  
        if r < p34:  
            results = results + '4'  
        else:  
            results = results + '3'  
    else:  
        if r < p43:  
            results = results + '3'  
        else:  
            results = results + '4'  
  
print(results)  
obs4 = results.count('4')  
obs3 = results.count('3')  
obs43 = results.count('43')  
obs44 = obs4 - obs43  
obs34 = results.count('34')  
obs33 = obs3 - obs34  
obsParams = (obs4/N, chi4, obs43*obs34/(obs44*obs33),Q)  
obsParams
```
